# Supplementary material for: Complexity of coronary artery disease and the release of cardiac biomarkers after CABG
Source: Frontiers journal article supplement (doi:10.3389/fcvm.2024.1345439), 2024-02-01

## Supplemental material to

*“Complexity of coronary artery disease and the release of cardiac biomarkers after CABG”*

**Supplemental Table 1:** Grouping of cohort

|                | <b>Syntax 1</b> |                | <b>Syntax 2</b> |
|----------------|-----------------|----------------|-----------------|
| Lower Tertile  | <24.0           | Lower Tertile  | <25.3           |
| Middle Tertile | 24.0-32.0       | Middle Tertile | 25.3-34.9       |
| Upper Tertile  | >32.0           | Upper Tertile  | >34.9           |

Patients were divided into three groups according to their SYNTAX Score and SYNTAX Score II results.

**Supplemental Table 2:** Associations between SYNTAX Score / SYNTAX Score II and cardiac biomarkers upon cardiac surgery for elective cases only

| <b>hs-cTnT</b> | <b>R<sup>2</sup></b> | <b>p-val</b> |
|----------------|----------------------|--------------|
| Syntax 1       | 0.002                | 0.257        |
| Syntax 2       | 0.003                | 0.137        |
| <b>CK-MB</b>   |                      |              |
| Syntax 1       | 0.003                | 0.143        |
| Syntax 2       | 0.002                | 0.287        |

**Supplemental Table 3:** Occurrence of myocardial infarction and PCI prior to the surgery

| <b>SYNTAX Score</b>   |                                 |                                         |                                          |                                         |                |
|-----------------------|---------------------------------|-----------------------------------------|------------------------------------------|-----------------------------------------|----------------|
|                       | <b>All patients<br/>n = 919</b> | <b>Lower Tertile<br/>n= 304 (33.1%)</b> | <b>Middle Tertile<br/>n= 309 (33.6%)</b> | <b>Upper Tertile<br/>n= 306 (33.3%)</b> | <b>p-value</b> |
| Myocardial infarction | 434 (47.2%)                     | 136 (44.7%)                             | 140 (45.3%)                              | 158 (51.6%)                             | 0.166          |
| MI time               |                                 |                                         |                                          |                                         | 0.376          |
| <6h                   | 10 (2.3%)                       | 6 (4.4%)                                | 1 (0.7%)                                 | 3 (1.9%)                                |                |
| 6-24h                 | 10 (2.3%)                       | 1 (0.7%)                                | 4 (2.9%)                                 | 5 (3.2%)                                |                |
| 1-7d                  | 55 (12.7%)                      | 19 (14.0%)                              | 13 (9.3%)                                | 23 (14.6%)                              |                |
| 8-21d                 | 73 (16.8%)                      | 16 (11.8%)                              | 23 (16.4%)                               | 34 (21.5%)                              |                |
| 22-89d                | 126 (29.0%)                     | 39 (28.7%)                              | 50 (35.7%)                               | 37 (23.4%)                              |                |
| >90d                  | 160 (36.9%)                     | 55 (40.4%)                              | 49 (35.0%)                               | 56 (35.4%)                              |                |
| PCI                   | 238 (25.9%)                     | 83 (27.3%)                              | 86 (27.8%)                               | 69 (22.5%)                              | 0.259          |
| PCI time              |                                 |                                         |                                          |                                         | 0.91           |
| <6h                   | 19 (8.0%)                       | 7 (8.4%)                                | 6 (7.0%)                                 | 6 (8.7%)                                |                |
| >6h                   | 219 (92.0%)                     | 76 (91.6%)                              | 80 (93.0%)                               | 63 (91.3%)                              |                |

  

| <b>SYNTAX Score II</b> |                                 |                                         |                                          |                                         |                |
|------------------------|---------------------------------|-----------------------------------------|------------------------------------------|-----------------------------------------|----------------|
|                        | <b>All patients<br/>n = 919</b> | <b>Lower Tertile<br/>n= 309 (33.6%)</b> | <b>Middle Tertile<br/>n= 305 (33.2%)</b> | <b>Upper Tertile<br/>n= 305 (33.2%)</b> | <b>p-value</b> |
| Myocardial infarction  | 434 (47.2%)                     | 156 (50.5%)                             | 137 (44.9%)                              | 141 (46.2%)                             | 0.352          |
| MI time                |                                 |                                         |                                          |                                         | 0.138          |
| <6h                    | 10 (2.3%)                       | 1 (0.6%)                                | 2 (1.5%)                                 | 7 (5.0%)                                |                |
| 6-24h                  | 10 (2.3%)                       | 2 (1.3%)                                | 5 (3.6%)                                 | 3 (2.1%)                                |                |
| 1-7d                   | 55 (12.7%)                      | 16 (10.3%)                              | 18 (13.1%)                               | 21 (14.9%)                              |                |
| 8-21d                  | 73 (16.8%)                      | 28 (17.9%)                              | 17 (12.4%)                               | 28 (19.9%)                              |                |
| 22-89d                 | 126 (29.0%)                     | 48 (30.8%)                              | 44 (32.1%)                               | 34 (24.1%)                              |                |
| >90d                   | 160 (36.9%)                     | 61 (39.1%)                              | 51 (37.2%)                               | 48 (34.0%)                              |                |
| PCI                    | 238 (25.9%)                     | 81 (26.2%)                              | 77 (25.2%)                               | 80 (26.2%)                              | 0.951          |
| PCI time               |                                 |                                         |                                          |                                         | 0.722          |
| <6h                    | 10 (2.3%)                       | 8 (9.9%)                                | 5 (6.5%)                                 | 6 (7.5%)                                |                |
| >6h                    | 10 (2.3%)                       | 73 (90.1%)                              | 72 (93.5%)                               | 74 (92.5%)                              |                |

PCI = percutaneous coronary intervention.

**Supplemental Figure 1: Flow chart**

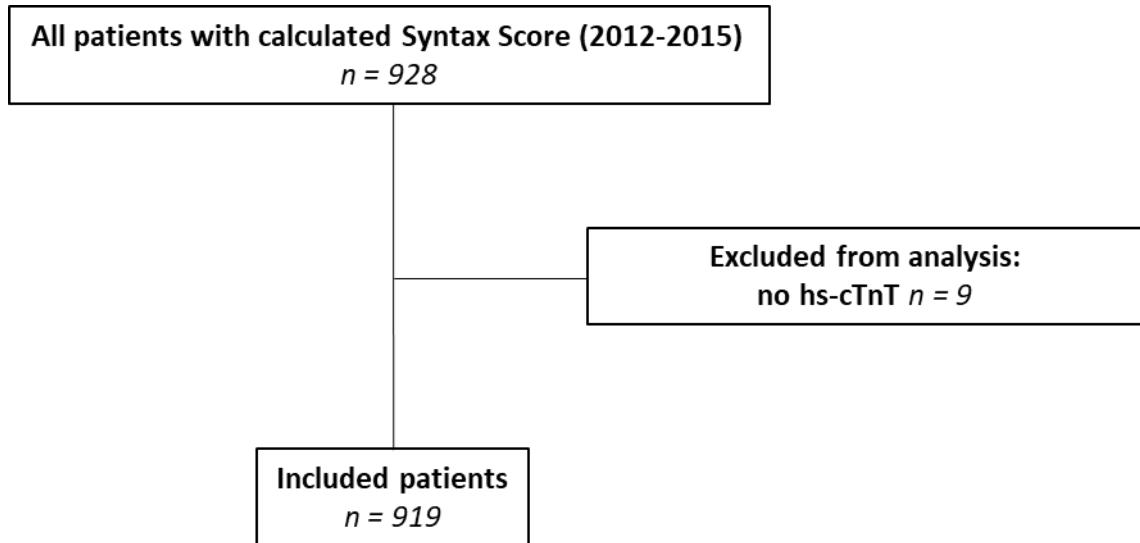

**Supplemental Figure 2:**

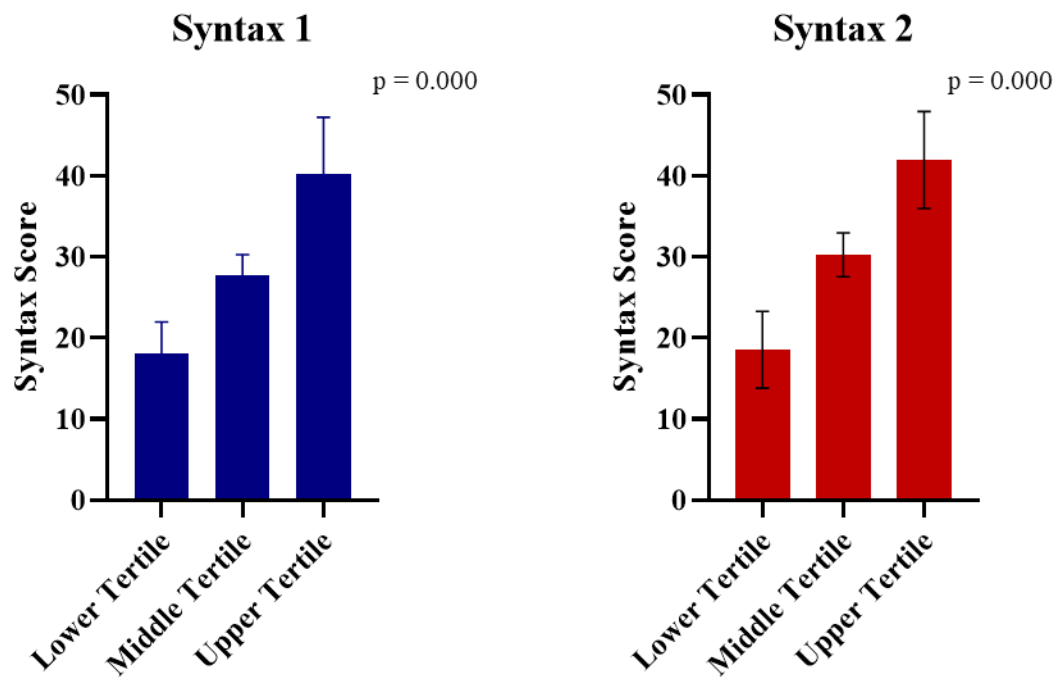

Supplement: Data_Sheet_1.pdf [file Data_Sheet_1.pdf]
